# Supplementary material for: Controlling Energy Radiations of Electromagnetic Waves via Frequency Coding Metamaterials
Source: PubMed Central journal article supplement (PMC5604374; doi:10.1002/advs.201700098), 2017-05-26
Supplement: ADVS-4-na-s001.pdf [file ADVS-4-na-s001.pdf]

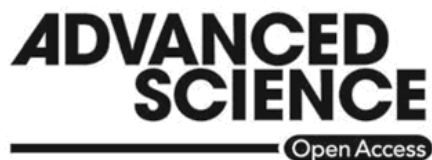

## Supporting Information

for *Adv. Sci.*, DOI: 10.1002/advs.201700098

Controlling Energy Radiations of Electromagnetic Waves via  
Frequency Coding Metamaterials

*Haotian Wu, Shuo Liu, Xiang Wan, Lei Zhang, Dan Wang,  
Lianlin Li, and Tie Jun Cui\**

DOI: 10.1002/kfu.202392222; :

Article type: Full Paper

Supporting Information

## Controlling energy radiations of electromagnetic waves via frequency coding metamaterials

*Haotian Wu, Shuo Liu, Xiang Wan, Lei Zhang, Dan Wang, Lianlin Li and Tie Jun Cui\**

Hao Tian Wu, Shuo Liu, Xiang Wan, Lei Zhang, Dan Wang, Prof. Tie Jun Cui\*

State Key Laboratory of Millimeter Waves, Southeast University, Nanjing 210096, China

Prof. Lianlin Li

School of Electronic Engineering and Computer Sciences, Peking University, Beijing 100871, China

**This file includes:**

Supporting Text

Supporting Figs. S1

### 1. Far-field energy of 1-bit frequency coding metamaterials

We use the reflected electric field on the metamaterial  $E(x)$  to calculate the far-field energy, as illustrated in Supporting **Figure S1**. Then the reflected energy by the metamaterial sample in the far distance is obtained as

$$E(r) = \int E(x) e^{j\omega t} \times e^{-j\frac{2\pi}{\lambda}r} dx \quad (16)$$

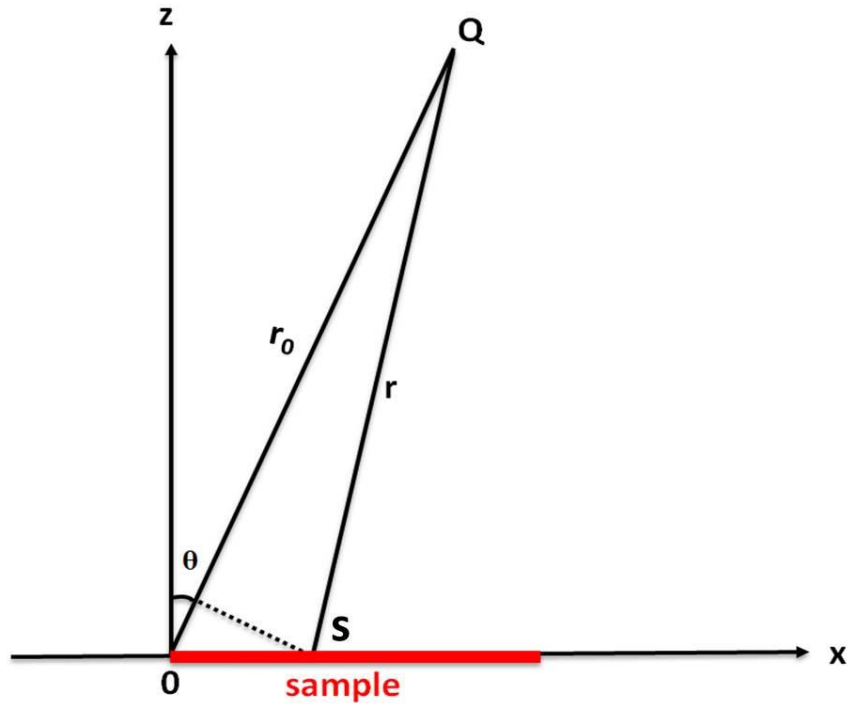

**Supporting Figure S1. Schematic to calculate far-field energy of 1-bit frequency coding metamaterial.**

The distance  $r$  between points  $Q$  and  $S$  can be rewritten as

$$r \approx r_0 - x \sin \theta \quad (17)$$

since  $r$  is much larger than  $x$ . Here,  $r_0$  is the distance of observation point  $Q$  to the origin point, and  $\theta$  is the angle between the observation point to the  $z$  axis, as shown in Supporting Figure S1.

Hence  $E(r)$  is expressed as

$$E(r) = \int E(x) \times e^{j\omega t} \times e^{-j\frac{2\pi}{\lambda}r} dx = e^{j\omega t} \times e^{-j\frac{2\pi}{\lambda}r_0} \int (E(x) \times e^{j2\pi\frac{\sin\theta}{\lambda}x}) dx \quad (18)$$

The phase distribution of 1-bit frequency coding metamaterial is  $0, \varphi, 0, \varphi, 0, \varphi \dots$  with  $N$  periods. Thus  $E(x)$  is expressed as:

$$E(x) = \sum_{n=0}^{2N-1} E_0 \times \Pi_D[x - nD] \times e^{j\frac{1}{2}[1 - (-1)^n]\varphi} \quad (19)$$

where  $E_0$  is the magnitude of  $E(x)$ ,  $D$  is half length of a period,  $N$  is the number of periods, and

$$\Pi_D(x) = \begin{cases} 1 & -D/2 \leq x \leq D/2 \\ 0 & \text{others} \end{cases} \quad (20)$$

Then we denote

$$A = e^{j\omega t} \times e^{-j\frac{2\pi}{\lambda}r_0} \quad (21)$$

$$P = -2\pi \cdot \sin \theta / \lambda$$

Therefore,  $E(r)$  can be obtained as

$$E(r) = A \cdot \int (E(x) \times e^{-jPx}) dx$$

$$= A \cdot \int \left\{ \sum_{n=0}^{2N-1} E_0 \times \Pi_D[x - nD] \times e^{j\frac{1}{2}[1 - (-1)^n]\varphi} \times e^{-jPx} \right\} dx$$

$$= N \cdot D \cdot A \cdot E_0 \times \text{sinc}\left(\frac{PD}{2}\right) \times (1 + e^{j\varphi}) \quad (22)$$

When  $\theta = 0$ , we have  $P = -2\pi \times \sin \theta / \lambda = 0$ , and the corresponding far field energy at angle  $\theta = 0$  is proportional to

$$|E(r)|^2 = N^2 D^2 A^2 E_0^2 \times (1 + e^{j\varphi})^2 \quad (23)$$

where  $N^2 D^2 A^2 E_0^2$  is unchanged for a given sample. Hence the expression shows that the far-field energy at the angle  $\theta = 0$  is proportional to  $E^2 |1 + e^{j\varphi}|^2$  and  $\varphi$  is calculated from Equations (3), (5) and (6) in the main text as:

$$\varphi = 7\pi/9 - [7\pi/9 + (-\pi/4.5) \times (f - f_0)] = 2\pi/9 \times (f - f_0) \quad (22)$$

which increases from 0 to  $\pi$  as the frequency increases from 6 to 10.5GHz. As a consequence, the far-field energy at angle  $\theta = 0$  should approach zero when the frequency is close to  $f_1 = 10.5\text{GHz}$  because  $E^2 |1 + e^{j\varphi}|^2$  is approaching zero when the frequency is close to  $f_1 = 10.5\text{GHz}$ .

## 2. Non-periodic frequency sweeping metamaterials

The phase responses for 2-bit frequency coding units are

$$\varphi(f)^{'00-00'} \approx \frac{7\pi}{9}$$

$$\varphi(f)^{'00-01'} \approx \frac{7\pi}{9} - \frac{\pi}{9}(f - f_0)$$

$$\varphi(f)^{'00-10'} \approx \frac{7\pi}{9} - \frac{2\pi}{9}(f - f_0)$$

$$\varphi(f)^{'00-11'} \approx \frac{7\pi}{9} - \frac{3\pi}{9}(f - f_0) \quad (23)$$

Once the phase expressions are obtained, the phase differences of adjacent unit cells are calculated as

$$\begin{aligned}\varphi(f)^{'00-01'} - \varphi(f)^{'00-00'} &\approx \left[ \frac{7\pi}{9} - \frac{\pi}{9}(f - f_0) \right] - \frac{7\pi}{9} = -\frac{\pi}{9}(f - f_0) \\ \varphi(f)^{'00-10'} - \varphi(f)^{'00-01'} &\approx \left[ \frac{7\pi}{9} - \frac{2\pi}{7}(f - f_0) \right] - \left[ \frac{7\pi}{9} - \frac{\pi}{9}(f - f_0) \right] = -\frac{\pi}{9}(f - f_0) \\ \varphi(f)^{'00-11'} - \varphi(f)^{'00-10'} &\approx \left[ \frac{7\pi}{9} - \frac{3\pi}{7}(f - f_0) \right] - \left[ \frac{7\pi}{9} - \frac{2\pi}{7}(f - f_0) \right] = -\frac{\pi}{9}(f - f_0)\end{aligned}\quad (24)$$

Note that phase differences between adjacent unit cells are the same and linearly proportional to the change of frequency  $f - f_0$  in the operational band. From the generalized Snell's law, the deflected angle  $\theta$  of the anomalous reflection beam is given by

$$\theta_r = \sin^{-1} \left[ \frac{\lambda}{2\pi} \cdot \frac{d\varphi}{dx} \right] \quad (25)$$

Since  $\frac{d\varphi}{dx} \approx \frac{\varphi^{'00-01'} - \varphi^{'00-00'}}{L}$  for approximation, in which  $L$  is the length of the super unit cell,

and  $\lambda = 10^{-9}c/f$  ( $c = 3 \times 10^8$  m/s is the light speed in free space and the unit of  $f$  is GHz), the deflected angel  $\theta_r$  is obtained as

$$\begin{aligned}\theta_r &= \sin^{-1} \left[ \frac{\lambda}{2\pi} \cdot \frac{d\varphi}{dx} \right] \\ &\approx \sin^{-1} \left\{ \frac{10^{-9} \times c}{2\pi f} \cdot \left[ \frac{-\pi}{9}(f - f_0) \right] \right\} \\ &= -\sin^{-1} \left[ \frac{25}{27} \left( 1 - \frac{f_0}{f} \right) \right]\end{aligned}\quad (26)$$

Hence the reflection angle  $|\theta_r|$  monotonically increases in the operational frequency band.
